# 1 **A pathogen-encoded signaling receptor mediating host-like** 2 **interactions through intrinsic disorder**

3

4 Marta F. M. Vieira<sup>a</sup>, Guillem Hernandez<sup>a</sup>, Tiago Veloso<sup>a</sup>, Miguel Arbesú<sup>b</sup>, Andreas Zanzoni<sup>c</sup> Tiago  
5 N. Cordeiro<sup>a</sup>

6

7 <sup>a</sup>Instituto de Tecnologia Química e Biológica António Xavier, Universidade Nova de Lisboa, Av. da  
8 República, 2780-157 Oeiras Portugal

9

10 <sup>b</sup>Department of NMR-supported Structural Biology, Leibniz-Forschungsinstitut für Molekulare  
11 Pharmakologie, Robert-Rössle-strasse 10, 13125 Berlin, Germany

12

13 <sup>c</sup>Aix-Marseille Univ, Inserm, TAGC, UMR\_S1090, Marseille, France

14

15 Corresponding author: [tiago.cordeiro@itqb.unl.pt](mailto:tiago.cordeiro@itqb.unl.pt)

16

## 17 **Abstract**

18 The translocated intimin receptor (Tir) is a central effector of Attaching and Effacing (A/E)  
19 pathogens responsible for worldwide foodborne disease cases. Upon delivery into host cells, Tir  
20 acts as a cell-signaling receptor, rewiring host cellular processes to assist infection. We found that  
21 this bacterial-encoded transmembrane protein comprises highly disordered intracellular domains  
22 bearing host-like motifs that bind host proteins. This unexpected trait was found prevalent in  
23 several other effectors secreted by A/E bacteria. We assessed Tir's intrinsic disorder by an  
24 integrative structural biophysics approach, unveiling that its intracellular side comprises a partially  
25 structured N-terminal dimer (N-Tir) and a disordered C-terminal tail (C-Tir). NMR analysis  
26 revealed that C-Tir has pre-existing transient structures at phosphorylation sites, including host-  
27 like immunoreceptor tyrosine-based inhibitory motifs (ITIMs). These ITIM-like sequences were  
28 found to bind lipid bilayers as previously observed for host T-cell receptor cytoplasmic disordered  
29 domains. C-Tir's membrane affinity is residue-specific and modulated by lipid composition,  
30 suggesting a regulation layer based on membrane composition. Using NMR, we also observed  
31 that the disordered C-Tir displays multisite tyrosine-phosphorylation sites that mediate

32 promiscuous binding to the C-terminal SH2 domain of host SHP-1 in dynamic equilibrium.  
33 Together, these novel insights provide an updated picture of Tir's structural features and highlight  
34 Tir-mediated mimicry of host disordered membrane receptors as a molecular strategy for host  
35 cell subversion.

36

### 37 **Keywords**

38 Intrinsically disordered proteins | bacterial effectors | EPEC/EHEC | molecular mimicry and  
39 multivalency | Host-pathogen interactions

40

### 41 **Summary**

42 Tir is a cellular receptor secreted by life-threatening pathogens. Upon delivery into host cells, Tir  
43 inserts the host plasma membrane providing a means for these extracellular pathogens to control  
44 host intracellular processes. To prevent pathogens from relying on Tir, it is essential to understand  
45 its intracellular mechanics. This paper provides a coherent picture of the intracellular side of Tir,  
46 highlighting its ability to copycat the interactions of disordered intracellular domains of host  
47 immune receptors. This copycatting allows the bacterial pathogens to modulate critical host  
48 processes, allowing infection to spread further without triggering the immune system response.  
49 This work proposes that other bacterial secreted pathogenic proteins exploit intrinsic disorder to  
50 hijack human cells, suggesting a widespread host subversion mechanism.

51

### 52 **Introduction**

53 Intrinsically disordered proteins and regions (IDPs and IDRs, respectively) are widespread across  
54 all kingdoms of life (1). They do not adopt well-defined structures but exist as dynamic  
55 conformational ensembles that display unique properties complementary to globular proteins (2,  
56 3). IDPs/IDRs play essential roles in virtually all signaling pathways in the cell (4), including cell  
57 cycle (5), circadian circuits (6), post-transcriptional regulation (7), and protein degradation (8).  
58 Given their ubiquitous relevance in cellular signaling and regulation, the onset of several human  
59 diseases, including cancer and neurodegeneration, are linked to dysfunctional disordered proteins  
60 (9). A common hallmark of IDPs/IDRs is the high occurrence of short linear motifs, also known  
61 as eukaryotic linear motifs (ELMs) (10), which are stretches of 3-10 contiguous residues mediating  
62 transient protein-protein interactions (e.g., post-translational modifications sites, targeting  
63 signals) (11). For instance, phosphorylation sites are often found in protein IDRs, where they can

64 modify charge and hydrophobicity and modulate interactions with partners (7). The prevalence  
65 of such functional elements in IDRs provides versatility to cell interaction hubs by enabling  
66 flexibility and adaptability to multiple interaction interfaces (12, 13). Importantly, IDR sequence  
67 composition is biased towards low complexity and charged residues favoring electrostatic  
68 interactions at lipid bilayer surfaces (14), with lipid-binding proteins accounting for 15% of all  
69 disordered proteins (15). As a result, intrinsic disorder is also common in membrane receptors,  
70 particularly in their intracellular domains (16, 17).

71  
72 Disordered proteins make up 30-50% of eukaryotes' proteins (18, 19). In contrast, they are  
73 remarkably less abundant in prokaryotes. However, increasing experimental evidence in the  
74 literature shows that several effector proteins secreted by pathogenic bacteria contain functionally  
75 relevant IDRs (20). A well-known case is the oncogenic *Helicobacter pylori* effector CagA, which  
76 promiscuously recruits host proteins to potentiate oncogenic signaling via a long IDR (22).  
77 Another illustrative example is the effector CyaA of *Bordetella pertussis*, the causative agent of  
78 whooping cough that interacts with host calmodulin via a disordered stretch of 75 amino acid  
79 residues (21). Other less-ordered effectors are also secreted by Enteropathogenic and  
80 Enterohemorrhagic *Escherichia coli* strains (EPEC and EHEC, respectively), such as EspF(U)/TccP  
81 (22) and EspB (23).

82  
83 EPEC is a leading cause of child deaths worldwide (24), and EHEC causes hemolytic uremic  
84 syndrome (HUS), defined by acute kidney failure, low platelet count, and destruction of red blood  
85 cells (25). These bacteria attach to the gut mucosa, causing a histopathological condition known  
86 as the 'attaching and effacing' (A/E) lesions, characterized by actin-rich pedestal formation and  
87 microvilli degeneration. To establish a replicative niche on host cells, EPEC/EHEC delivers a vast  
88 repertoire of effectors (26, 27). In light of this, we ran a structural disorder analysis on the  
89 collection of effectors secreted by A/E-bacteria and searched for ELMs evidence. Among A/E-  
90 bacteria disordered effectors, we found the prominent translocated intimin receptor (Tir) to be a  
91 disordered membrane receptor with a relatively high density of host-like ELMs, particularly in its  
92 intracellular domains. Tir is the first effector secreted during infection (28). Once inside the host,  
93 it migrates to the plasma membrane to act as a receptor for intimin presented at the bacterial  
94 surface (29), anchoring A/E pathogens to targeted host cells. By mediating attachment, Tir also  
95 facilitates translocation of additional T3SS secreted effectors (30). Moreover, Tir promotes actin

96 polymerization (31), suppresses autophagy (32) and immune response (33) to allow bacterial  
97 survival on the host cell's surface. It also triggers pyroptotic cell death (34) (35). As a membrane  
98 receptor, Tir adopts a hairpin topology with the external intimin-binding domain (IBD) (36)  
99 connecting two transmembrane domains, with both N- and C-terminus in the host cytoplasm,  
100 interacting with multiple intracellular eukaryotic proteins (37, 38). Those intracellular regions  
101 enable Tir to interact with at least 25 host intracellular targets (38), such as host tyrosine  
102 phosphatases SHP-1/2 to suppress pro-inflammatory cytokines signaling (33, 39) and TAK1-  
103 mediated immune response (40).

104  
105 Despite all these findings, the structural mechanisms underlying Tir intracellular regions' function  
106 during infection are poorly understood. To gain further insights into Tir structural dynamics, we  
107 devised an integrative structure-based biophysical study to experimentally assess their intrinsic  
108 disorder and multivalency. In particular, we focus our attention on self-assembly, accessibility to  
109 multi-site phosphorylation, host protein- and membrane-binding of Tir intracellular regions. We  
110 found that N-Tir is a flexible dimer with a hybrid architecture of ordered and disordered regions,  
111 opening the question of whether host signaling activation involves structural changes of  
112 preformed dimers. Moreover, the present work shows that C-Tir can bind to lipid bilayers through  
113 short host-like motifs that, when phosphorylated, interact with the C-terminal SH2 domain (C-  
114 SH2) of host SHP-1 in dynamic equilibrium. Together these findings highlight a molecular  
115 mechanism through which Tir can interact with host components through mimicry and  
116 multivalency.

117

## 118 **Results and Discussion**

119

### 120 **Structural disorder and short linear motifs are common features of** 121 **A/E pathogen effectors**

122 To quantify the prevalence of disorder propensity among A/E pathogens, we predicted the  
123 disorder content of A/E effectors by using DISOPRED3 (41) (**Fig. 1**) and IUPred 1.0 (42, 43))  
124 (**Fig. S1**) structural disorder predictors. We observed that A/E effectors have a higher disorder  
125 propensity than their proteome counterparts in EHEC O157:H7, the closely related  
126 Enteropathogenic *E. coli* H127:H6 (EPEC), and *Citrobacter rodentium* (CR) — the standard small

127 animal A/E pathogen model (**Fig. 1A, Table S1**). Subsequently, we classified them into five  
128 structural categories, based on disorder content (see **Material and Methods for details**). Our  
129 analysis shows that A/E pathogens have a structurally diverse repertoire of effectors, ranging  
130 from fully unstructured to ordered proteins (**Fig. 1B**). While most proteins are folded in all  
131 prokaryotic collections as a whole and individually (**Fig. S2A**), fully disordered effectors are  
132 predicted to be two to four-fold more frequent than the whole bacterial proteome (1.9% vs. 7.7  
133 % on average, far from the 32.7 % of the human proteome) (**Fig. S1B**). Partially Disordered  
134 Proteins (PDR) with long disordered regions occur in EPEC effectors similar to the human  
135 proteome. For instance, we classified as PDR the EspB effector, which is involved in cytoskeleton  
136 rearrangement and previously identified as an inherently less-ordered effector (23). An additional  
137 example of PDR is the NleH effector, a protein kinase with a disordered N-terminal domain that  
138 binds the ribosomal protein 3 (RPS3) to manipulate the NF- $\kappa$ B pathway (44, 45). In the order-to-  
139 disorder continuum, the effector EspF is akin to EspF(U) as a fully disordered protein (**Fig. 1C**).  
140 Both effectors contain multiple consecutive repeats of linear motif pairs able to bind critical host  
141 components for actin assembly, with EspF having three to five repetitions depending on the strain  
142 (46), and EspFu, only secreted by EHEC, five-and-a-half repeats (47) (**Fig. S2B**).

143  
144 Our analysis highlights Tir as a disordered effector (**Fig. 1C, Fig. S2B**). Except for the  
145 transmembrane domains, Tir displays a high disorder propensity within its IBD and intracellular  
146 regions (**Fig. S1D**). Increasing evidence shows that pathogens exploit host-like motifs as a  
147 strategy to interact with host components to subvert host cellular functions (48–50). On this  
148 basis, we searched the A/E effectors for eukaryotic linear motifs (ELMs) and found that aside  
149 from EspF and EspF(U), other A/E effectors bear multiple putative ELM instances (**Fig. 1C**). Tir  
150 emerged again as having several predicted ELMs in their intracellular regions, including  
151 experimentally verified SH3- and SH2-domain binding motifs (51). Structural disorder and high  
152 ELM density support Tir's ability to interact with several host proteins (38). There is a correlation  
153 between disorder content and ELM density, being Tir, EspF(U), and EspF clustered with the  
154 highest disorder fraction and motif overall density (**Fig. 1C**), similarly to eukaryotic IDPs (11, 52).  
155 This correlation highlights ELMs within disordered segments of bacterial effectors as a strategy  
156 to disrupt host networks. Disordered effectors, such as Tir, are an exception to the general trend  
157 that prokaryotic proteins are less disordered. Given the ubiquitous presence of IDPs as  
158 transcriptional factors (53) and, more generally, as hubs in host networks (54), bacterial effectors

159 with host-like disordered proteins features are an efficient way to subvert host eukaryotic systems  
160 and promote infection. We selected Tir to study how disordered effectors control the host by  
161 validating the predicted structural disorder and molecular mimicry within its intracellular domains.

162

## 163 **Tir bears an intrinsically disordered C-terminal tail**

164 Tir secreted by A/E pathogens share substantial sequence-conservation and high frequency of  
165 disorder-promoting residues at the N- and C-terminal regions (N-Tir and C-Tir, respectively, both  
166 localized to the host intracellular side (**Fig. S3**). We assessed experimentally the structural  
167 disorder propensity of EPEC N-Tir and C-Tir by multiple biophysical methods, including small-  
168 angle X-ray scattering (SAXS), circular dichroism (CD), and liquid-state nuclear magnetic  
169 resonance (NMR). For this integrative study, we used the protein constructs encompassing the  
170 residues 1-233 and 388-550 from the N-terminal and C-terminal cytosolic regions of EPEC Tir,  
171 respectively (**Fig. S3**). Analytical size-exclusion chromatography (SEC) in combination with SAXS  
172 indicated a monomeric state for C-Tir in solution with a radius of gyration ( $R_g$ ) of  $38.8 \pm 0.2 \text{ \AA}$   
173 and a maximum distance ( $D_{max}$ ) of  $128.0 \pm 5.0 \text{ \AA}$  (**Table S4**). The  $R_g$ -values of IDPs  
174 approximately followed a power law of  $R_g = 2.54N^{0.522}$  (55, 56) as a function of sequence length  
175 ( $N$ ). Using this relationship, the predicted  $R_g$ -value is  $37.4 \text{ \AA}$  for the 173-residue C-Tir construct  
176 ending with a StrepTag (8 extra residues). The similarity between the experimental and predicted  
177 values suggests that C-Tir might adopt IDP-like structures in solution. The SAXS-derived Kratky  
178 plot of C-Tir also shows characteristics of disordered or unfolded proteins; monotonically  
179 increasing without a well-defined maximum (**Fig. 2A**). This feature is absent in globular proteins  
180 and implies conformational heterogeneity and flexibility for C-Tir (57). Likewise, the asymmetric  
181 pair distance distribution function,  $P(r)$ , obtained from the scattering data is compatible with a  
182 highly flexible protein sampling pairwise distances far exceeding those expected for a globular  
183 protein of the same molecular weight (56) (**Fig. S4**). The intrinsic disorder of C-Tir is also  
184 reflected in its CD and [ $^1\text{H}$ - $^{15}\text{N}$ ]-HSQC NMR spectra. C-Tir's CD profile has negative ellipticity at  
185 200 nm and a shallow band in the 210–230 nm range (**Fig. 2B**), indicating a high content of  
186 random coil with minimal ordered structural elements (58). The [ $^1\text{H}$ - $^{15}\text{N}$ ]-HSQC NMR spectrum for  
187 this construct displays a typical IDP fingerprint with low chemical shift dispersion (59) (**Fig. 2C**).  
188 We observed a similar spectrum for the equivalent region of Tir from EHEC (**Fig. 2C**). Although  
189 all A/E pathogens produce Tir, actin polymerization by EHEC Tir C-terminus requires Esp(U)/TccP  
190 (60), which is unneeded in EPEC to initiate actin pedestal formation in host cells (31). Besides the

191 different mechanisms, C-Tir is disordered in both strains, thus highlighting the conservation and  
192 functional importance of structural disorder in this intracellular domain for A/E virulence.

193 Overall, the different biophysical measurements are consistent with a highly dynamic protein,  
194 unambiguously showing that the C-terminal half of Tir is an IDR that lacks a well-folded structure  
195 under native-like conditions. This inherent flexibility potentially enables Tir for multiple binding  
196 while working as a pathogenic scaffold/hub recruiting host proteins to perturb cellular functions.  
197

## 198 **C-Tir displays non-random structural preferences at sites of** 199 **phosphorylation and host interactions**

200 We employed NMR to dissect with further detail subtle structural features of C-Tir. The NMR  
201 chemical shift is the most readily accessible observable in NMR and sensitive to, even partial,  
202 secondary structural elements present in IDPs (59). To gain access to this information, we  
203 assigned the backbone resonances of C-Tir nuclei using standard triple-resonance spectra at high-  
204 field, together with reverse labeling (**Fig. S5**). Reverse labeling of selected amino-acids (61)  
205 proved to be a cost-efficient approach to assign this disordered protein by reducing the spectral  
206 ambiguity and should be readily applied to other IDPs (see SI **Methods and Materials**).

207 Provided with the assignment, we calculated the NMR chemical shift deviations ( $\Delta\delta$ ) to random coil  
208 values of intrinsically disordered proteins (62). Although C-Tir has properties of a random coil,  
209 these so-called NMR secondary shifts allowed us to identify two regions with non-random  
210 structural preferences. In IDPs, transient secondary structural elements are often crucial in acting  
211 as molecular recognition units, playing significant roles in binding (63, 64). In figure **Fig. 3A**, the  
212 consecutive positive  $\Delta\delta_{C\alpha}-\Delta\delta_{C\beta}$  values indicate a tendency for  $\alpha$ -helical structure in two distal  
213 segments of C-Tir: (I) D420-Q435; II) I507-A515. Both stretches include residues that are  
214 phosphorylated by host kinases, S434 and Y511, respectively. By taking into account all the  
215 assigned backbone resonances into a neighbor-corrected sequence structural propensity  
216 calculator (nsSPC) score (65), these apparent local  $\alpha$ -helical regions became even more evident.  
217 New stretches also emerged with a putative  $\alpha$ -helical propensity, including a sequence contiguous  
218 to Y511 and downstream tyrosine 483 and a few C-terminal residues (**Fig. 3A**).

219 Structural signatures near phosphorylation sites can affect kinase selectivity to disordered  
220 substrates (66), and phosphorylation can modulate partially structured elements for regulation  
221 (67). Phosphorylation of Tir on serines S434 and S463 by host protein kinase A (PKA) triggers  
222 changes that affect its conformational and self-assembling properties (68, 69). So, the enhanced

223  $\alpha$ -helical propensity near S434 might play a role in PKA-mediated phosphorylation effects on Tir  
224 structure and function (32, 70). Moreover, tyrosines Y483 and Y511 are core residues of Tir's  
225 host-like Immunoreceptor tyrosine-based inhibitory motifs (ITIMs). The intracellular signaling  
226 associated with Tir ITIMs relies on the phosphorylation of the central tyrosine by Src family  
227 kinases (SFKs), creating a binding site for SH2-containing proteins, which become activated upon  
228 recruitment. Yet, we found that unphosphorylated C-Tir can recognize host SH2-domains with  
229 low-intermediate affinity. Using the C-terminal SH2 domain (C-SH2) of phosphatase SHP-1, we  
230 identified, by NMR, that residues surrounding the unphosphorylated Y511 ITIM-like motif are  
231 involved in binding SH2 domains (**Fig. 3B-C**). Binding to C-Tir caused a selective loss of intensities  
232 for the HSQC peaks, mainly from residues A<sub>512</sub>LLA<sub>515</sub>. Visible NMR signals retained low-dispersion,  
233 indicating that the protein remains mostly disordered and flexible in the complex. We estimated  
234 an apparent  $K_D$  of *ca.* 68.5 $\mu$ M for this interaction (**Fig. 3D**). Thus, besides encoding for  $\alpha$ -helical  
235 structures, the sequence surrounding Y511 (i+4) has a chemical signature for SH2-domain  
236 binding pre-phosphorylation. This observation highlights that those residues adjacent to Y511 can  
237 define a binding motif for C-SH2, likely serving as a precursor to a tighter binding upon  
238 phosphorylation. The presence of a pre-existing transiently helix at this region suggests a possible  
239 role for this structure as molecular recognition elements for C-Tir.

240  
241 Remarkably, Tir ITIMs share with cytoplasmic tyrosine-based sequence motifs of host receptors  
242 the ability to adopt  $\alpha$ -helical conformations. Indeed, host ITIMs and Immunoreceptor tyrosine-  
243 based activation (ITAMs) can form dynamic/transient  $\alpha$ -helices, whether in free (71, 72) or  
244 membrane-bound state (73). Their dynamic binding to membranes is postulated to regulate  
245 tyrosine sites' access to phosphorylation, providing a switch between functional and non-  
246 functional conformations (74). The helical conformation in ITIMs/ITAMs is stabilized *in vitro* in  
247 the presence of 2,2,2-trifluoroethanol (TFE) or through binding to detergent micelles and lipids  
248 (72, 73, 75). In the presence of membrane-mimetic solvent TFE, we found that C-Tir exhibited a  
249 substantial increase in secondary structure, with the CD signature of a partial helical protein (**Fig.**  
250 **S6A**). This conformational change is followed by chemical shift differences (**Fig. S6B-C**) and a  
251 differential decrease in peak intensities of the C-Tir amide proton resonances in the presence of  
252 increasing amounts of TFE, mainly around Y511 and Y483 and not at S434 (**Fig 3E**). This effect  
253 supports an enhanced  $\alpha$ -helical conformation propensity around the two tyrosines, and a putative



254 role in membrane-binding, as postulated for some host tyrosine-based motifs that undergo TFE-  
255 induced structural changes (72).

256 Our NMR results show that unphosphorylated C-Tir host-like ITIM motifs can adopt pre-formed  
257 structures relevant to membrane binding and molecular recognition of SH2 domains of signaling  
258 proteins.

259

## 260 **Disordered C-Tir binds lipids**

261 The ability to form  $\alpha$ -helices stabilized by TFE prompts us to further investigate lipid binding by  
262 C-Tir. To do so, we incubated  $^{15}\text{N}$ -labelled C-Tir with different bicelles, which are small planar  
263 bilayers of long-chain lipids closed by curved micelle-like walls of short-chain lipids. These disk-  
264 like structures are membrane models extensively used to explore protein-membrane interactions,  
265 including those involving disordered proteins (76). As long-chain lipids, we used 1,2-dimyristoyl-  
266 *sn*-glycero-3-phosphocholine (DMPC) or the acidic lipid 1,2-dimyristoyl-*sn*-glycero-3-  
267 phosphorylglycerol (DMPG) mixed with the short-chain lipid 1,2-dihexanoyl-*sn*-glycero-3-  
268 phosphocholine (DHPC), offering the possibility to create bicelles with different lipid charge  
269 density.

270 In the presence of bicelles containing DMPC lipids, we observed a significant residue-specific  
271 decrease in the ratio of NMR signals around Y511; yet more subtle, also around Y483, as  
272 previously induced with TFE (**Fig. 4**). This finding shows that C-Tir does interact with non-charged  
273 lipid bilayers predominantly via its Y511-motif, including mostly hydrophobic residues, such as  
274  $A_{512}LLA_{515}$ . We further tested the influence of increasing negatively charged lipid head groups on  
275 C-Tir membrane association with bicelles containing DMPG lipids. Our NMR data show a more  
276 extended NMR signal attenuation in the presence of DMPG/DHPC bicelles, even including the first  
277 stretch of residues of this construct, which display some positively charged residues (e.g., R388  
278 and K389) (**Fig. 4**). In the context of the full-length protein, these residues define the membrane-  
279 proximal region (**Fig. S3**). Given its proximity to the cell plasma membrane, it is reasonable to  
280 assume its involvement in membrane binding. Aside from Y511 surrounding residues, the  
281 sequence around Y483 is also notably affected by anionic lipid content, indicating that lipid-charge  
282 content modulates C-Tir membrane binding modes. Contrary, the residues 395-475 did not show  
283 any membrane interaction. This region has a net negative charge ( $pI \sim 4.5$ ), whereas the  
284 sequences displaying membrane ability are positive ( $pI \sim 9.9$ ), thus in line with an electrostatic  
285 model. In this residue range, C-Tir bears two experimental confirmed host protein binding sites:

286 a) NCK Src Homology 2 (SH2) domain binding motif (31); and b) NPY motif that interacts with  
287 the I-BAR domain of host IRSp53/IRTKS (77). With both bicelles, the last C-terminal residues of  
288 C-Tir also show NMR-signal attenuation indicative of membrane-binding (**Fig. 4B**). These residues  
289 (A<sub>541</sub>PTPGPVR<sub>550</sub>) emerge as part of a potential new lipid-binding region, also affected by TFE  
290 (**Fig. 3E, Fig. S6C**) and showing ncSPC values indicating  $\alpha$ -helical propensity (**Fig. 3A**). Our data  
291 thus suggest that C-Tir can undergo multivalent electrostatic interactions with lipid bilayers that  
292 might potentially fine-tune Tir's activity in the host cell.

293

### 294 **Multi-phosphorylated C-Tir is a disordered multivalent cytosolic tail**

295 In the host, Tir becomes phosphorylated by Src family protein tyrosine kinases (PTKs) at several  
296 tyrosine phosphorylation sites targeting SH2 domain-containing host proteins. To fully assess its  
297 ability to recruit SH2 domains, we reconstructed C-Tir's Tyr-phosphorylated state and evaluated  
298 its binding to C-SH2. To this end, we incubated C-Tir with the Src family PTK Fyn, and  
299 quantitatively monitored its phosphorylation by NMR (78). The sensitivity of chemical shifts to  
300 changes caused by phosphorylation allowed us to identify four phosphorylated tyrosine sites along  
301 the disordered C-Tir modified by Fyn (i.e., Y454, Y474, Y483, Y511). Phosphorylation caused  
302 small but noticeable changes in the chemical shifts of the tyrosines and adjacent residues. The  
303 [<sup>1</sup>H-<sup>15</sup>N]-HSQC spectrum displayed low amide proton dispersion, a diagnostic that the C-Tir  
304 remains disordered upon multisite phosphorylation. Moreover, the secondary chemical shifts of  
305 this 4-fold phosphorylated state (pC-Tir) did not reveal substantial changes in local structure  
306 propensity due to phosphorylation (**Fig. S7**), as similarly reported for other disordered proteins  
307 (79, 80).

308 To evaluate the interaction of phosphorylated C-Tir (pC-Tir) with an SH2 domain, we titrated  
309 unlabeled C-SH2 into a <sup>15</sup>N-labeled pC-Tir solution and monitored the binding interaction  
310 broadening of signals in NMR [<sup>1</sup>H-<sup>15</sup>N]-HSQC spectra (**Fig. 5A,B**). With the resonance re-  
311 assignment of pC-Tir, we identified that upon phosphorylation, all tyrosine sites interact with C-  
312 SH2, and not exclusively the Y511-based motif as observed for unphosphorylated C-Tir. The  
313 interaction caused a drop in peak intensities around each site (i.e., i= pY454, pY474, pY483,  
314 pY511), including roughly residues i+4 and i-1, even at sub-stoichiometric conditions (**Fig. 5B**).  
315 This suggests a "fuzzy" multivalent binding of C-SH2 to four xYx(x) $\phi$  motifs, where  $\phi$  is  
316 hydrophobic (V/L/I) (**Fig. 5C**), with multiple pYs on C-Tir interacting with C-SH2 in dynamic  
317 equilibrium (79). Except for these residues, backbone chemical shift changes were relatively

318 small, with spectra displaying sharp line widths and low dispersion, both characteristics of a  
319 disordered protein. Thus, pC-Tir binds C-SH2 retaining its high level of disorder. The relative  
320 signal intensities at each phospho-tyrosine (pY) and surrounding residues approximately reflect  
321 the fraction of unbound sites, allowing us to estimate their apparent local binding affinity (**Fig.**  
322 **S8**). Phosphorylation enhanced the binding to Y511 ITIM by  $\sim 10$  fold and enabled other tyrosine-  
323 based motifs to engage C-SH2. Among the four pYs, the resonances around pY454 were less  
324 broadened during the titration, suggesting lower local binding. The remaining pYs bind C-SH2  
325 with similar strength ( $\sim 3-9 \mu\text{M}$ ). Overall, phosphorylation at multiple tyrosine sites provides  
326 various SH2 docking sites and reinforces the role of Tir as a scaffolding hub.

327

### 328 **Tir's N-terminal intracellular tail is a dimer with order-disordered** 329 **duality**

330 In a similar fashion, we evaluated whether the N-terminal cytosolic region of Tir (N-Tir; **Fig S2**)  
331 was also intrinsically disordered. Yet, contrary to C-Tir, this region adopts a flexible but more  
332 defined structure. Based on SEC-SAXS data, the N-Tir is a non-globular protein with an  $R_g$  of  
333  $37.70 \pm 0.10 \text{ \AA}$  and a  $D_{max}$  of  $140.0 \pm 10.0 \text{ \AA}$  (**Fig. 6A**) (**Table S4**), and a molecular weight  
334 compatible with a 52kDa dimer, in line with the observed gel filtration retention time. Like C-Tir,  
335 the respective  $P(r)$  curve is highly asymmetric but bimodal, with a peak at  $21.9 \text{ \AA}$  and a prominent  
336 shoulder at  $35.9 \text{ \AA}$ , suggesting that the dimer is elongated with spatially separated lobes. Its  
337 SAXS-derived Kratky plot is also not bell-shaped as expected for a non-globular and flexible  
338 arrangement (**Fig. 6B**). The corresponding SAXS-driven *ab initio* reconstruction highlights an  
339 elongated S-shaped core for the dimeric N-Tir 1-233 polypeptide fused to a C-terminal Strep-Tag  
340 (**Fig. S4**). This extended dimer is largely disordered but contains stable secondary structural  
341 elements. Its far-UV CD profile reveals a partially folded protein, marked by a negative maximum  
342 at 205 nm due to high disorder content. The positive signal at 190 nm and the negative shoulder  
343 at 220 nm reflect ordered elements (**Fig. 6C**). So, SAXS and CD data indicated that N-Tir is a  
344 partially folded dimer. To probe the order-disorder interplay within N-Tir at high-resolution, we  
345 have collected NMR data at different temperatures.

346 For globular proteins, the 52kDa dimer size is beyond the practical range amenable to traditional  
347 NMR spectroscopy in solution. The NMR signals of larger molecules relax faster, leading to line  
348 broadening, low spectral sensitivity, and eventually loss of NMR signals. This problem is even  
349 more significant at low temperatures. Nevertheless, we found that the 52kDa dimer has a  $[^1\text{H-}$

350  $^{15}\text{N}$ ]-HSQC NMR spectrum at 5 °C characterized by intense signals and low chemical shift  
351 dispersion akin to an IDP (**Fig. 6D**). We assigned the resonances at 5 °C mostly to the first 80  
352 and last 35 residues of the N-Tir, meaning that those regions are flexible in solution. The missing  
353 resonances of the central residues became visible with increasing temperature due to faster  
354 tumbling. At 35 °C, they adopted an NMR fingerprint of a folded-like protein (**Fig. 6E**), reflecting  
355 a more well-structured region. With NMR, we could establish that N-Tir's central sequence has  
356 the broad NMR fingerprint of a well-folded protein, flanked by residues with poorly dispersed  $^1\text{H}^{\text{N}}$   
357 backbone resonances pointing disorder. A closer look at the structural disorder predictions  
358 computed for N-Tir also suggests an order-disorder duality, with flanking residues more flexible  
359 than those in the central region (**Fig. S9A**). Such disordered segments harbor linear motifs that  
360 were experimentally identified to interact with host proteins (**Fig. S2B**) (51, 81).  
361 The partial deletion of these disordered regions reduced the random-coil content reported by CD  
362 data, highlighting a more structured central part of N-Tir (N-Tir<sub>60-200</sub>, hereafter NS-Tir). The  
363 difference between CD spectra resulted in a pure random-coil CD signature, reinforcing that the  
364 flanking regions are disordered, whereas the central part folded. NS-Tir's CD profile displays  
365 positive values below 200 nm and two negative bands at 210 and 222 nm, commonly associated  
366 with structured secondary conformations (**Fig. 6C**).  
367 We have employed SAXS to probe further the overall structure of NS-Tir. Our synchrotron SEC-SAXS data  
368 confirmed that NS-Tir is still a stable dimer in solution. A slightly less broadened Kratky profile reflects the  
369 absence of the disordered flanking regions (**Fig. 6B**) but compatible with an elongated dimer (**Fig.**  
370 **6F**), retaining a similar overall conformation supported by NMR. We acquired [ $^1\text{H}$ - $^{15}\text{N}$ ]-HSQC data  
371 for NS-Tir and superimposed them to N-Tir spectra (**Fig. S9B**). Over 75% of the visible  
372 resonances overlapped between the two constructs, with a low dispersion for the  $^1\text{H}$  dimension  
373 at 5 °C and a broader [ $^1\text{H}$ - $^{15}\text{N}$ ]-fingerprint at 35 °C, indicating that NS-Tir maintained a similar  
374 folded isolated and in the full-length N-terminal region context. The reversible thermal  
375 denaturation of NS-Tir monitored by far-UV CD shows the dimer unfolding in two discrete steps,  
376 capturing both folding and dimerization events. It reveals a stable dimer that unfolds and  
377 dissociates by increasing temperature (82) (**Fig. S10**).  
378 Overall, our results support a model of Tir spanning the host plasma membrane with flexible N-  
379 terminal intracellular domains assembled in a dimer form (**Fig 7**). In this model, N-Tir is anchored  
380 to the membrane by flexible segments and with dangling linear motifs located at its disordered  
381 N-termini.

## 382 **Concluding Remarks**

383 We observed that A/E pathogens have a structurally diverse repertoire of protein effectors  
384 enriched in disorder-prone residues. Some effectors are fully disordered proteins with a high  
385 density of putative host-like motifs that can mediate the interaction with human proteins. Among  
386 those highly disordered effectors emerged Tir, a 56 kDa membrane protein essential for virulence.  
387 Using multiple biophysical methods, we found that Tir-ICDs (i.e., N-Tir and C-Tir) are highly  
388 disordered with IDR features similar to those found in the cytoplasmic domains of host  
389 transmembrane proteins. NMR analysis showed that C-Tir is not exclusively disordered but can  
390 adopt partial secondary structural elements near phosphosites and motifs involved in versatile  
391 interactions with the host (i.e., protein and lipid-binding). The C-Tir displays cytoplasmic tyrosine-  
392 based motifs present in the disordered cytosolic tails of host receptors. The standard mode of  
393 action associated with these motifs is the phosphorylation of the central tyrosine by Src family  
394 PTKs, creating a binding site for SH2-containing proteins. In C-Tir, we found that one of those  
395 motifs, involving Y511, displays a pre-formed transient helical structure and binds the C-terminal  
396 SH2 domain of SHP-1 pre-phosphorylation, interacting as well with lipid bilayers (**Fig.3, Fig. 7**).  
397 These observations highlight a functional diversity for C-Tir and a possible cooperation between  
398 host proteins and the membrane in signaling processes inside the host (14). Some T-cell receptor  
399 cytoplasmic disordered domains associate with the plasma membrane via tyrosine-based motifs  
400 with a helical propensity, and such association regulates phosphorylation and downstream  
401 signaling (74). Like the CD3 $\epsilon$  cytoplasmic domain of the T-cell receptor (73), C-Tir also has two  
402 tyrosines involved in lipid-binding and helical propensity. Our results suggest that the C-terminal  
403 half Tir can mimic this regulatory stratagem to fine-tune its ability to interact with human cell  
404 components, thereby interfering with normal cellular functions. Further studies are needed to  
405 corroborate this initial observation. Nevertheless, we show that the C-Tir can interact with  
406 membranes via ITMs and its last C-terminal residues. Importantly, our results established that  
407 this membrane affinity is residue-specific and modulated by lipid composition in a quantitative  
408 and site-resolved way, suggesting the existence of a regulation layer based on lipid composition.  
409 The flexibility and conformational plasticity of C-Tir make it readily accessible for phosphorylation.  
410 We found in C-Tir four *bona fide* tyrosine phosphorylation sites that render the ability for  
411 multivalent/promiscuous binding, supporting its ability to act as a signaling hub. Even though we  
412 only used protein fragments and explored one phosphorylation state, our results support the  
413 presence of four phospho-tyrosines (pY) in the C-Tir sequence coexisting simultaneously. All can

414 bind the C-SH2 in the micromolar range as reported for other pY-containing motifs (84).  
415 Interestingly, the pY454 site, which displays the lowest affinity, is part of a conserved NPY motif  
416 (**Fig. S3**) that interacts with the I-BAR domain of host IRSp53/IRTKS, linking Tir to the actin  
417 polymerization machinery (77) in a phosphorylation-independent manner. This suggests that  
418 Y454 might act as a binding site for distinct and competing host proteins depending on its  
419 phosphorylation state.

420 The superposition of interplaying functional elements observed in C-Tir and their possible  
421 interplay mirror the mechanics of human intrinsically disordered domains. Transiently structured  
422 lipid-binding regions might bury tyrosine residues rendering them inaccessible, while their  
423 phosphorylation perturbs membrane anchoring (85). At the same time, these multiple  
424 modification sites promiscuously participate in fuzzy binding of host partners, their respective  
425 affinities being interdependent with the phosphorylation state. Future work using high-resolution  
426 structural studies targeting the interaction with multiple partners and different C-Tir's  
427 phosphorylation states will provide additional insights into Tir binding specificity and action mode.  
428 We unraveled for the first time that the N-terminal region, yet partially disordered, forms a stable  
429 dimer with potential implications on Tir self-assembly and signaling. Clustering of Tir triggers host  
430 signaling events when binding to intimin. The extracellular intimin binding domain (IBD) of Tir  
431 binds intimin as a dimer (**Fig. 7**) (36) in a reticulating model (83). Thus, Tir's intracellular self-  
432 assembly opens the question of whether host signaling activation involves intimin-induced  
433 dimerization or structural changes of preformed dimers.

434 Together, these novel structural insights provide an updated picture of Tir's intracellular side (**Fig.**  
435 **7**), laying the path towards illustrating how Tir hijacks host signaling. Importantly, yet less  
436 abundant in prokaryotes, the structural disorder of Tir and several other A/E effectors reinforce  
437 the idea of a positive evolutionary selection towards disordered proteins in the pool of secreted  
438 effectors by bacterial pathogens to target host cellular machinery (20).

439

## 440 **Methods and Materials**

### 441 Disorder prediction and short linear motif analysis

442 We collected the sequence of A/E pathogen effectors and corresponding reference proteomes  
443 from the UniprotKB database (86) (**Table S1**). Three effector sets were assembled for the  
444 following strains: EHEC, EPEC, and CR. The representative set of 20,365 human proteins was

445 extracted from UniprotKB human reference proteome. To compute disorder propensity at the  
446 residue level, we used DISOPRED 3 (41) and IUPred 1.0 ("long" mode prediction) (42), structural  
447 disorder predictors. Disordered residues were defined as those with a propensity score equal to  
448 or above 0.5. We used this metric to calculate the fraction of disordered residues for each protein.  
449 The one-sided Mann-WhitneyU-test (87) was used to compare disorder fraction distribution of  
450 the effector collections and their corresponding proteomes (**SI Materials and Methods**). Both  
451 per-residue scores and aggregated disorder fractions were used to classify each protein according  
452 to the structural categories adapted from (88) (IDP: Intrinsically disordered proteins; PDR:  
453 Proteins with intrinsically disordered regions; FRAG: Proteins with fragmented-disorder; NDR: Not  
454 disordered proteins; ORD: Ordered Proteins). See **SI Materials and Methods** and **Table S2**  
455 for a detailed description of the criteria used to define the structural categories. The list of  
456 eukaryotic short linear motifs (ELMs) was downloaded from the ELM database (89) (version 1.4,  
457 May 2017). We searched for occurrences of putative ELMs in effector sequences using the  
458 ANCHOR tool (90). For each effector sequence, we calculated the motif density as the fraction  
459 between the amino acids belonging to putative ELMs predicted as disordered and the total number  
460 of amino acids predicted as disordered.

## 461 Protein expression and purification

462 All constructs (C-Tir, C-SH2, N-Tir, and NS-Tir) were subcloned into the pHTP8 plasmid  
463 (NZYTech), bearing a cleavable His<sub>6</sub>-tagged thioredoxin tag (TRX-His<sub>6</sub>) for improved solubility  
464 and folding. They were successfully expressed using *E. coli* BL21 Star (DE3) pLysS and purified  
465 by affinity chromatography and Size-Exclusion gel filtration. More details in **SI Material and**  
466 **Methods**.

## 467 NMR spectroscopy

468 All NMR experiments were recorded on an 800 MHz Bruker Avance II+ spectrometer equipped  
469 with a cryoprobe. The backbone assignment was performed combining standard triple-  
470 resonance experiments and reverse labeling (61). NMR is well suited to study such dynamic and  
471 transient interactions in solution at single-residue resolution. We extensively explored the  
472 sensitivity of NMR to changes in the chemical environment to monitor phosphorylation, protein-  
473 and lipid-binding. More details in **SI Material and Methods**.

## 474 Small-angle X-ray scattering (SAXS)

475 We employed synchrotron SAXS coupled with size exclusion chromatography (SEC) to probe the  
476 overall size and conformational properties of Tir intracellular regions. A comprehensive  
477 description of SAXS measurements and analysis is described in detail in **SI Material and**  
478 **Methods.**

## 479 Bicelles preparation

480 Bicelles with different charge density were prepared based on the protocols described in refs (76,  
481 91). See **SI Material and Methods** for additional details.

## 482 Tyrosine phosphorylation

483 Fully phosphorylation of four tyrosines in C-Tir was achieved by incubating the protein with human  
484 recombinant Fyn Kinase overnight (71). Optimized experimental conditions are detailed on **SI**  
485 **Material and Methods.**

## 486 Data and software availability

487 The NMR chemical shifts of C-Tir and pC-Tir are available at the Biological Magnetic Resonance  
488 (BMR) data bank under the entry 50758, 50759, respectively. The SEC-SAXS data can be found  
489 at the Small Angle Scattering Biological Data Bank (SASBDB) under the project "SAXS studies on  
490 the intracellular region of the translocated intimin receptor". The accession codes are SASDKF8,  
491 SASDKG8 and SASDKH8. Proteome and effector collections, disorder predictions, derived  
492 aggregated data and figures are available for download <https://osf.io/3mka9/>. The associated  
493 code is available at <https://osf.io/cxkjf/>.

494

## 495 **Acknowledgements**

496 MFMV is funded by a MolBioS FCT PhD program fellowship (PD/BD/135482/2018). National funds  
497 financially support GH through the PT-NMR FCT PhD Program (PD/BD/147227/2019). TNC is  
498 recipient of the grant CEECIND/01443/2017. This work was funded by national funds through  
499 FCT– Fundação para a Ciência e a Tecnologia, I.P. (FCT), Project MOSTMICRO-ITQB with refs



500 UIDB/04612/2020 and UIDP/04612/2020 and FEDER Funds through COMPETE 2020 (0145-  
501 FEDER-007660). We acknowledge using the ESRF-BM29 (MX-2085-BAG) and DLS-B21 Bio-SAXS  
502 beamlines (MX20161-1, SM21035-177). We thank Miquel Pons, from UB, and Lígia Martins, and  
503 Adriano Henriques, from ITQB-NOVA, for many helpful discussions. We thank Isabel Pacheco,  
504 João Carita, Cristina Timoteo, and Teresa Silva (Research Facilities, ITQB-NOVA) for their  
505 technical assistance. MA thanks Prof. Hartmut Oschkinat and FMP-Berlin for the financial support.  
506 AZ acknowledges the financial support of the JPI HDHL-INTIMIC action cofunded by the Agence  
507 Nationale de la Recherche (ANR-17-HDIM-0001-03) and thanks Fabrice Lopez and Aurélie Bergon  
508 (TAGC, Marseille) for technical assistance. NMR data were acquired at CERMAT, ITQB-NOVA,  
509 Oeiras, Portugal, with equipment funded by FCT, project AAC 01/SAICT/2016.

510

## 511 **Author contributions**

512           Conceptualization: TNC

513           Methodology: MA, AZ, TNC

514           Investigation: MFMV, GH, TV, MA, AZ, TNC

515           Supervision: TNC

516           Writing—review & editing: MA, AZ, TNC

517

## 518 **Competing interests**

519 Authors declare that they have no competing interests.

520

## 521 **References**

- 522 1. Z. Peng, *et al.*, Exceptionally abundant exceptions: comprehensive characterization of  
523 intrinsic disorder in all domains of life. *Cell. Mol. Life Sci.* **72**, 137–151 (2015).
- 524 2. M. M. Babu, R. W. Kriwacki, R. V. Pappu, Structural biology. Versatility from protein  
525 disorder. *Science* **337**, 1460–1461 (2012).
- 526 3. V. N. Uversky, Intrinsically disordered proteins and their “mysterious” (meta)physics.  
527 *Front. Phys.* **7** (2019).
- 528 4. P. E. Wright, H. J. Dyson, Intrinsically disordered proteins in cellular signalling and  
529 regulation. *Nat. Rev. Mol. Cell Biol.* **16**, 18–29 (2015).
- 530 5. C. A. Galea, Y. Wang, S. G. Sivakolundu, R. W. Kriwacki, Regulation of cell division by  
531 intrinsically unstructured proteins: intrinsic flexibility, modularity, and signaling conduits.

- 532 *Biochemistry* **47**, 7598–7609 (2008).
- 533 6. J. F. Pelham, J. C. Dunlap, J. M. Hurley, Intrinsic disorder is an essential characteristic of  
534 components in the conserved circadian circuit. *Cell Commun. Signal.* **18**, 181 (2020).
- 535 7. A. Bah, J. D. Forman-Kay, Modulation of Intrinsically Disordered Protein Function by Post-  
536 translational Modifications. *J. Biol. Chem.* **291**, 6696–6705 (2016).
- 537 8. R. van der Lee, *et al.*, Intrinsically disordered segments affect protein half-life in the cell  
538 and during evolution. *Cell Rep.* **8**, 1832–1844 (2014).
- 539 9. V. N. Uversky, Wrecked regulation of intrinsically disordered proteins in diseases:  
540 pathogenicity of deregulated regulators. *Front. Mol. Biosci.* **1**, 6 (2014).
- 541 10. N. E. Davey, *et al.*, Attributes of short linear motifs. *Mol. Biosyst.* **8**, 268–281 (2012).
- 542 11. K. Van Roey, *et al.*, Short linear motifs: ubiquitous and functionally diverse protein  
543 interaction modules directing cell regulation. *Chem. Rev.* **114**, 6733–6778 (2014).
- 544 12. V. Csizmok, A. V. Follis, R. W. Kriwacki, J. D. Forman-Kay, Dynamic protein interaction  
545 networks and new structural paradigms in signaling. *Chem. Rev.* **116**, 6424–6462 (2016).
- 546 13. N. Jespersen, E. Barbar, Emerging Features of Linear Motif-Binding Hub Proteins. *Trends*  
547 *Biochem. Sci.* **45**, 375–384 (2020).
- 548 14. J. Cornish, S. G. Chamberlain, D. Owen, H. R. Mott, Intrinsically disordered proteins and  
549 membranes: a marriage of convenience for cell signalling? *Biochem. Soc. Trans.* **48**,  
550 2669–2689 (2020).
- 551 15. E. Deryusheva, *et al.*, Does Intrinsic Disorder in Proteins Favor Their Interaction with  
552 Lipids? *Proteomics* **19**, e1800098 (2019).
- 553 16. J. Bürgi, B. Xue, V. N. Uversky, F. G. van der Goot, Intrinsic disorder in transmembrane  
554 proteins: roles in signaling and topology prediction. *PLoS ONE* **11**, e0158594 (2016).
- 555 17. M. Kjaergaard, B. B. Kragelund, Functions of intrinsic disorder in transmembrane proteins.  
556 *Cell. Mol. Life Sci.* **74**, 3205–3224 (2017).
- 557 18. W. Basile, M. Salvatore, C. Bassot, A. Elofsson, Why do eukaryotic proteins contain more  
558 intrinsically disordered regions? *PLoS Comput. Biol.* **15**, e1007186 (2019).
- 559 19. B. Xue, A. K. Dunker, V. N. Uversky, Orderly order in protein intrinsic disorder distribution:  
560 disorder in 3500 proteomes from viruses and the three domains of life. *J. Biomol. Struct.*  
561 *Dyn.* **30**, 137–149 (2012).
- 562 20. M. Marín, V. N. Uversky, T. Ott, Intrinsic disorder in pathogen effectors: protein flexibility  
563 as an evolutionary hallmark in a molecular arms race. *Plant Cell* **25**, 3153–3157 (2013).
- 564 21. D. P. O'Brien, *et al.*, Calmodulin fishing with a structurally disordered bait triggers CyaA  
565 catalysis. *PLoS Biol.* **15**, e2004486 (2017).
- 566 22. O. Aitio, *et al.*, Enterohaemorrhagic Escherichia coli exploits a tryptophan switch to hijack  
567 host f-actin assembly. *Structure* **20**, 1692–1703 (2012).

- 568 23. D. Hamada, M. Hamaguchi, K. N. Suzuki, I. Sakata, I. Yanagihara, Cytoskeleton-  
569 modulating effectors of enteropathogenic and enterohemorrhagic *Escherichia coli*: a case  
570 for EspB as an intrinsically less-ordered effector. *FEBS J.* **277**, 2409–2415 (2010).
- 571 24. T. H. Hazen, *et al.*, Genomic diversity of EPEC associated with clinical presentations of  
572 differing severity. *Nat. Microbiol.* **1**, 15014 (2016).
- 573 25. H. Pennington, *Escherichia coli* O157. *Lancet* **376**, 1428–1435 (2010).
- 574 26. W. Deng, *et al.*, Dissecting virulence: systematic and functional analyses of a  
575 pathogenicity island. *Proc Natl Acad Sci USA* **101**, 3597–3602 (2004).
- 576 27. T. Tobe, *et al.*, An extensive repertoire of type III secretion effectors in *Escherichia coli*  
577 O157 and the role of lambdoid phages in their dissemination. *Proc Natl Acad Sci USA*  
578 **103**, 14941–14946 (2006).
- 579 28. E. Mills, K. Baruch, X. Charpentier, S. Kobi, I. Rosenshine, Real-time analysis of effector  
580 translocation by the type III secretion system of enteropathogenic *Escherichia coli*. *Cell*  
581 *Host Microbe* **3**, 104–113 (2008).
- 582 29. B. Kenny, *et al.*, Enteropathogenic *E. coli* (EPEC) transfers its receptor for intimate  
583 adherence into mammalian cells. *Cell* **91**, 511–520 (1997).
- 584 30. S. E. Battle, M. J. Brady, S. K. Vanaja, J. M. Leong, G. A. Hecht, Actin pedestal formation  
585 by enterohemorrhagic *Escherichia coli* enhances bacterial host cell attachment and  
586 concomitant type III translocation. *Infect. Immun.* **82**, 3713–3722 (2014).
- 587 31. S. Gruenheid, *et al.*, Enteropathogenic *E. coli* Tir binds Nck to initiate actin pedestal  
588 formation in host cells. *Nat. Cell Biol.* **3**, 856–859 (2001).
- 589 32. Y. Xue, M. Du, H. Sheng, C. J. Hovde, M.-J. Zhu, *Escherichia coli* O157:H7 suppresses  
590 host autophagy and promotes epithelial adhesion via Tir-mediated and cAMP-independent  
591 activation of protein kinase A. *Cell Death Discov.* **3**, 17055 (2017).
- 592 33. D. Yan, X. Wang, L. Luo, X. Cao, B. Ge, Inhibition of TLR signaling by a bacterial protein  
593 containing immunoreceptor tyrosine-based inhibitory motifs. *Nat. Immunol.* **13**, 1063–  
594 1071 (2012).
- 595 34. P. J. Goddard, *et al.*, Enteropathogenic *Escherichia coli* Stimulates Effector-Driven Rapid  
596 Caspase-4 Activation in Human Macrophages. *Cell Rep.* **27**, 1008-1017.e6 (2019).
- 597 35. Q. Zhong, *et al.*, Clustering of Tir during enteropathogenic *E. coli* infection triggers  
598 calcium influx-dependent pyroptosis in intestinal epithelial cells. *PLoS Biol.* **18**, e3000986  
599 (2020).
- 600 36. Y. Luo, *et al.*, Crystal structure of enteropathogenic *Escherichia coli* intimin-receptor  
601 complex. *Nature* **405**, 1073–1077 (2000).
- 602 37. A. R. C. Wong, *et al.*, Enteropathogenic and enterohaemorrhagic *Escherichia coli*: even  
603 more subversive elements. *Mol. Microbiol.* **80**, 1420–1438 (2011).
- 604 38. S. Blasche, *et al.*, The EHEC-host interactome reveals novel targets for the translocated

- 605           intimin receptor. *Sci. Rep.* **4**, 7531 (2014).
- 606   39.   D. Yan, *et al.*, Enteropathogenic *Escherichia coli* Tir recruits cellular SHP-2 through ITIM  
607           motifs to suppress host immune response. *Cell. Signal.* **25**, 1887–1894 (2013).
- 608   40.   R. Zhou, *et al.*, Enterohemorrhagic *Escherichia coli* Tir inhibits TAK1 activation and  
609           mediates immune evasion. *Emerg. Microbes Infect.* **8**, 734–748 (2019).
- 610   41.   D. T. Jones, D. Cozzetto, DISOPRED3: precise disordered region predictions with  
611           annotated protein-binding activity. *Bioinformatics* **31**, 857–863 (2015).
- 612   42.   Z. Dosztányi, V. Csizmok, P. Tompa, I. Simon, IUPred: web server for the prediction of  
613           intrinsically unstructured regions of proteins based on estimated energy content.  
614           *Bioinformatics* **21**, 3433–3434 (2005).
- 615   43.   B. Mészáros, G. Erdos, Z. Dosztányi, IUPred2A: context-dependent prediction of protein  
616           disorder as a function of redox state and protein binding. *Nucleic Acids Res.* **46**, W329–  
617           W337 (2018).
- 618   44.   A. M. Grishin, *et al.*, NleH defines a new family of bacterial effector kinases. *Structure* **22**,  
619           250–259 (2014).
- 620   45.   X. Gao, *et al.*, Bacterial effector binding to ribosomal protein s3 subverts NF-kappaB  
621           function. *PLoS Pathog.* **5**, e1000708 (2009).
- 622   46.   A. Holmes, S. Mühlen, A. J. Roe, P. Dean, The EspF effector, a bacterial pathogen’s Swiss  
623           army knife. *Infect. Immun.* **78**, 4445–4453 (2010).
- 624   47.   N. A. Sallee, *et al.*, The pathogen protein EspF(U) hijacks actin polymerization using  
625           mimicry and multivalency. *Nature* **454**, 1005–1008 (2008).
- 626   48.   T. Hagai, A. Azia, M. M. Babu, R. Andino, Use of host-like peptide motifs in viral proteins  
627           is a prevalent strategy in host-virus interactions. *Cell Rep.* **7**, 1729–1739 (2014).
- 628   49.   A. Via, B. Uyar, C. Brun, A. Zanzoni, How pathogens use linear motifs to perturb host cell  
629           networks. *Trends Biochem. Sci.* **40**, 36–48 (2015).
- 630   50.   N. E. Davey, G. Travé, T. J. Gibson, How viruses hijack cell regulation. *Trends Biochem.*  
631           *Sci.* **36**, 159–169 (2011).
- 632   51.   B. Bommarius, *et al.*, Enteropathogenic *Escherichia coli* Tir is an SH2/3 ligand that recruits  
633           and activates tyrosine kinases required for pedestal formation. *Mol. Microbiol.* **63**, 1748–  
634           1768 (2007).
- 635   52.   P. Tompa, N. E. Davey, T. J. Gibson, M. M. Babu, A million peptide motifs for the  
636           molecular biologist. *Mol. Cell* **55**, 161–169 (2014).
- 637   53.   L. Staby, *et al.*, Eukaryotic transcription factors: paradigms of protein intrinsic disorder.  
638           *Biochem. J.* **474**, 2509–2532 (2017).
- 639   54.   C. Haynes, *et al.*, Intrinsic disorder is a common feature of hub proteins from four  
640           eukaryotic interactomes. *PLoS Comput. Biol.* **2**, e100 (2006).

- 641 55. P. Bernadó, M. Blackledge, A self-consistent description of the conformational behavior of  
642 chemically denatured proteins from NMR and small angle scattering. *Biophys. J.* **97**,  
643 2839–2845 (2009).
- 644 56. T. N. Cordeiro, *et al.*, Structural Characterization of Highly Flexible Proteins by Small-  
645 Angle Scattering. *Adv. Exp. Med. Biol.* **1009**, 107–129 (2017).
- 646 57. A. G. Kikhney, D. I. Svergun, A practical guide to small angle X-ray scattering (SAXS) of  
647 flexible and intrinsically disordered proteins. *FEBS Lett.* **589**, 2570–2577 (2015).
- 648 58. L. B. Chemes, L. G. Alonso, M. G. Noval, G. de Prat-Gay, Circular dichroism techniques for  
649 the analysis of intrinsically disordered proteins and domains. *Methods Mol. Biol.* **895**,  
650 387–404 (2012).
- 651 59. E. Delaforge, T. N. Cordeiro, P. Bernadó, N. Sibille, “Conformational characterization of  
652 intrinsically disordered proteins and its biological significance” in *Modern Magnetic*  
653 *Resonance*, G. A. Webb, Ed. (Springer International Publishing, 2018), pp. 381–399.
- 654 60. J. Garmendia, *et al.*, TccP is an enterohaemorrhagic Escherichia coli O157:H7 type III  
655 effector protein that couples Tir to the actin-cytoskeleton. *Cell. Microbiol.* **6**, 1167–1183  
656 (2004).
- 657 61. C. Prasanna, A. Dubey, H. S. Atreya, Amino acid selective unlabeled in protein NMR  
658 spectroscopy. *Meth. Enzymol.* **565**, 167–189 (2015).
- 659 62. K. Tamiola, B. Acar, F. A. A. Mulder, Sequence-specific random coil chemical shifts of  
660 intrinsically disordered proteins. *J. Am. Chem. Soc.* **132**, 18000–18003 (2010).
- 661 63. M. Fuxreiter, I. Simon, P. Friedrich, P. Tompa, Preformed structural elements feature in  
662 partner recognition by intrinsically unstructured proteins. *J. Mol. Biol.* **338**, 1015–1026  
663 (2004).
- 664 64. A. De Biasio, *et al.*, p15PAF is an intrinsically disordered protein with nonrandom  
665 structural preferences at sites of interaction with other proteins. *Biophys. J.* **106**, 865–  
666 874 (2014).
- 667 65. K. Tamiola, F. A. A. Mulder, Using NMR chemical shifts to calculate the propensity for  
668 structural order and disorder in proteins. *Biochem. Soc. Trans.* **40**, 1014–1020 (2012).
- 669 66. M.-H. Cho, J. O. Wrabl, J. Taylor, V. J. Hilser, Hidden dynamic signatures drive substrate  
670 selectivity in the disordered phosphoproteome. *Proc Natl Acad Sci USA* **117**, 23606–  
671 23616 (2020).
- 672 67. N. Stanley, S. Esteban-Martín, G. De Fabritiis, Kinetic modulation of a disordered protein  
673 domain by phosphorylation. *Nat. Commun.* **5**, 5272 (2014).
- 674 68. A. Hawrani, *et al.*, Effect of protein kinase A-mediated phosphorylation on the structure  
675 and association properties of the enteropathogenic Escherichia coli Tir virulence protein.  
676 *J. Biol. Chem.* **278**, 25839–25846 (2003).
- 677 69. P. R. Race, A. S. Solovyova, M. J. Banfield, Conformation of the EPEC Tir protein in

- 678 solution: investigating the impact of serine phosphorylation at positions 434/463. *Biophys.*  
679 *J.* **93**, 586–596 (2007).
- 680 70. S. Backert, B. Kenny, R. Gerhard, N. Tegtmeyer, S. Brandt, PKA-mediated  
681 phosphorylation of EPEC-Tir at serine residues 434 and 463: A novel pathway in  
682 regulating Rac1 GTPase function. *Gut Microbes* **1**, 94–99 (2010).
- 683 71. J. Rosenlöw, L. Isaksson, M. Mayzel, J. Lenggqvist, V. Y. Orekhov, Tyrosine  
684 phosphorylation within the intrinsically disordered cytosolic domains of the B-cell receptor:  
685 an NMR-based structural analysis. *PLoS ONE* **9**, e96199 (2014).
- 686 72. H. Cheng, *et al.*, Conformational Changes in the Cytoplasmic Region of KIR3DL1 upon  
687 Interaction with SHP-2. *Structure* **27**, 639–650.e2 (2019).
- 688 73. C. Xu, *et al.*, Regulation of T cell receptor activation by dynamic membrane binding of the  
689 CD3epsilon cytoplasmic tyrosine-based motif. *Cell* **135**, 702–713 (2008).
- 690 74. X. Xu, H. Li, C. Xu, Structural understanding of T cell receptor triggering. *Cell. Mol.*  
691 *Immunol.* **17**, 193–202 (2020).
- 692 75. E. Duchardt, A. B. Sigalov, D. Aivazian, L. J. Stern, H. Schwalbe, Structure induction of  
693 the T-cell receptor zeta-chain upon lipid binding investigated by NMR spectroscopy.  
694 *Chembiochem* **8**, 820–827 (2007).
- 695 76. Y. Pérez, *et al.*, Lipid binding by the Unique and SH3 domains of c-Src suggests a new  
696 regulatory mechanism. *Sci. Rep.* **3**, 1295 (2013).
- 697 77. J. C. de Groot, *et al.*, Structural basis for complex formation between human IRSp53 and  
698 the translocated intimin receptor Tir of enterohemorrhagic E. coli. *Structure* **19**, 1294–  
699 1306 (2011).
- 700 78. F.-X. Theillet, *et al.*, Site-specific NMR mapping and time-resolved monitoring of serine  
701 and threonine phosphorylation in reconstituted kinase reactions and mammalian cell  
702 extracts. *Nat. Protoc.* **8**, 1416–1432 (2013).
- 703 79. T. Mittag, *et al.*, Dynamic equilibrium engagement of a polyvalent ligand with a single-site  
704 receptor. *Proc Natl Acad Sci USA* **105**, 17772–17777 (2008).
- 705 80. A. L. Turner, *et al.*, Highly disordered histone H1-DNA model complexes and their  
706 condensates. *Proc Natl Acad Sci USA* **115**, 11964–11969 (2018).
- 707 81. A. Patel, *et al.*, Host protein interactions with enteropathogenic Escherichia coli (EPEC):  
708 14-3-3tau binds Tir and has a role in EPEC-induced actin polymerization. *Cell. Microbiol.*  
709 **8**, 55–71 (2006).
- 710 82. C. Rat, J. C. Heiby, J. P. Bunz, H. Neuweiler, Two-step self-assembly of a spider silk  
711 molecular clamp. *Nat. Commun.* **9**, 4779 (2018).
- 712 83. T. Touzé, R. D. Hayward, J. Eswaran, J. M. Leong, V. Koronakis, Self-association of EPEC  
713 intimin mediated by the beta-barrel-containing anchor domain: a role in clustering of the  
714 Tir receptor. *Mol. Microbiol.* **51**, 73–87 (2004).

- 715 84. M. J. Wagner, M. M. Stacey, B. A. Liu, T. Pawson, Molecular mechanisms of SH2- and  
716 PTB-domain-containing proteins in receptor tyrosine kinase signaling. *Cold Spring Harb.*  
717 *Perspect. Biol.* **5**, a008987 (2013).
- 718 85. M. Arbesú, G. Iruela, H. Fuentes, J. M. C. Teixeira, M. Pons, Intramolecular fuzzy  
719 interactions involving intrinsically disordered domains. *Front. Mol. Biosci.* **5**, 39 (2018).
- 720 86. UniProt Consortium, UniProt: the universal protein knowledgebase in 2021. *Nucleic Acids*  
721 *Res.* **49**, D480–D489 (2021).
- 722 87. H. B. Mann, D. R. Whitney, On a test of whether one of two random variables is  
723 stochastically larger than the other. *Ann. Math. Statist.* **18**, 50–60 (1947).
- 724 88. A. Giansanti, A. Deiana, S. Forcelloni, A. Porrello, New classification of intrinsic disorder in  
725 the human proteome. *BioRxiv* (2018) <https://doi.org/10.1101/446351>.
- 726 89. H. Dinkel, *et al.*, ELM 2016--data update and new functionality of the eukaryotic linear  
727 motif resource. *Nucleic Acids Res.* **44**, D294-300 (2016).
- 728 90. B. Mészáros, I. Simon, Z. Dosztányi, Prediction of protein binding regions in disordered  
729 proteins. *PLoS Comput. Biol.* **5**, e1000376 (2009).
- 730 91. M. Maffei, *et al.*, Lipid binding by disordered proteins. *Protoc. exch.* (2013)  
731 <https://doi.org/10.1038/protex.2013.094>.
- 732 92. D. I. Svergun, M. V. Petoukhov, M. H. Koch, Determination of domain structure of  
733 proteins from X-ray solution scattering. *Biophys. J.* **80**, 2946–2953 (2001).
- 734
- 735
- 736
- 737
- 738
- 739
- 740
- 741
- 742
- 743
- 744
- 745
- 746

## 747 Figures

748

749 **Fig. 1 - Predicted structural disorder in A/E pathogens.**

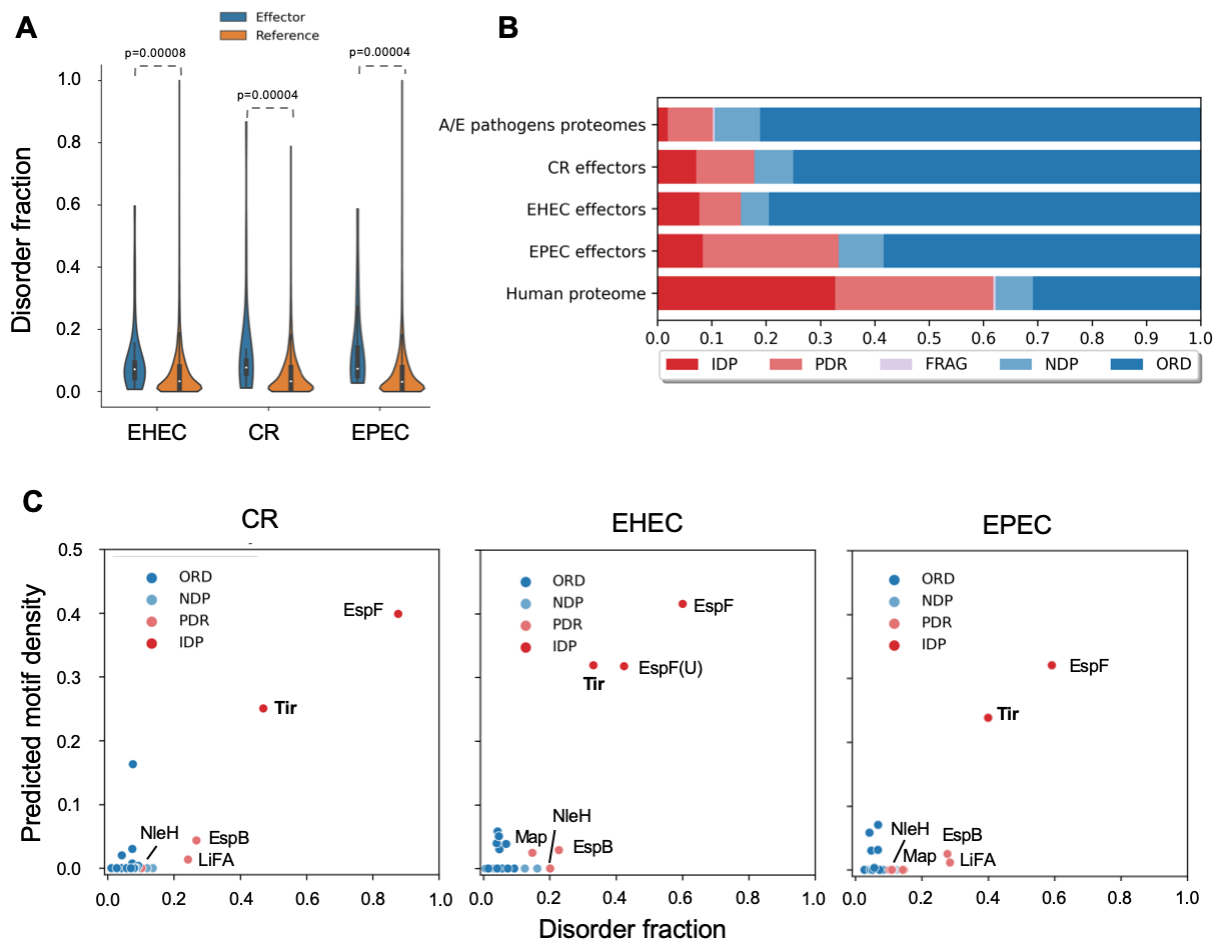

750

751 (A) Distribution of disorder fraction displayed as violin plots for effectors (blue) and full-proteomes (red) of  
 752 A/E pathogens. (B) Accumulated fractions of the structural categories in terms of structural disorder. IDP:  
 753 Intrinsically disordered proteins; PDR: Proteins with intrinsically disordered regions; FRAG: Proteins with  
 754 fragmented-disorder; NDR: Not disordered proteins; ORD: Ordered Proteins. See full definitions in **Table**  
 755 **S2** and the individual A/E pathogen proteomes in **Fig. S2**. (C) Fraction of ELMs vs. disorder fraction in A/E  
 756 effectors. Tir, EspF, and EspF(U) display a high motif content within disordered regions. IDP and PDR  
 757 effectors are labeled. See all data in **Table S3**.

758

759

760

761



762 **Fig. 2 - C-Tir is an intrinsically disordered domain.**

763

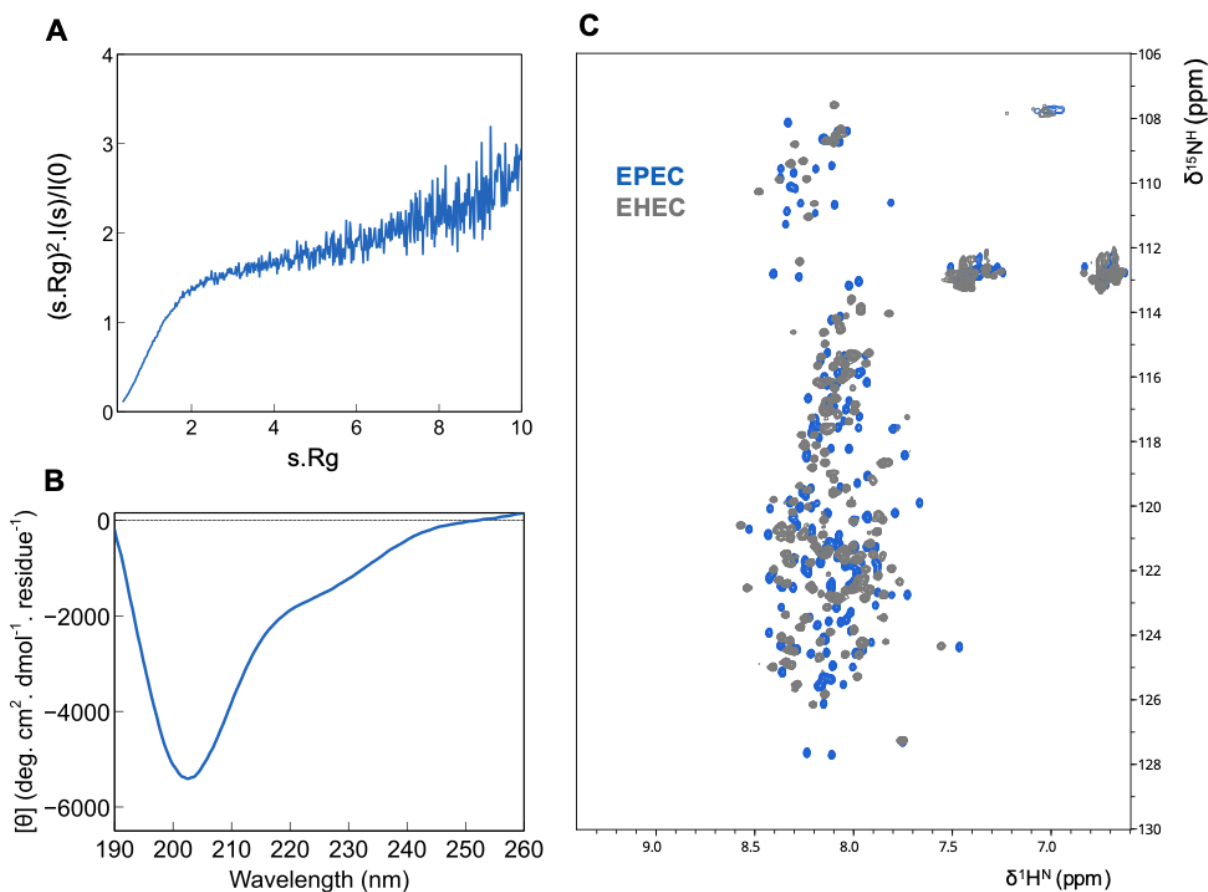

764

765 (A) Kratky representation of the SAXS profile measured for C-Tir indicating its lack of compactness. (B) Far-  
766 UV circular dichroism of C-Tir revealing the absence of high-populated structural secondary elements. (C)  
767 C-Tir EPEC (light blue) and C-Tir EHEC (grey)  $[^1H-^{15}N]$ -HSQC spectra reveal the narrow  $^1H$  chemical shift  
768 dispersion characteristic of IDPs with  $^1H$  amide backbone resonances clustering between 7.7 and 8.5 ppm.  
769 All together provide a definite diagnostic of protein disorder.

770

771

772

773

774

775

776

777

778 **Fig. 3 - C-Tir is disordered with residual secondary structure at sites of host**  
 779 **interaction.**

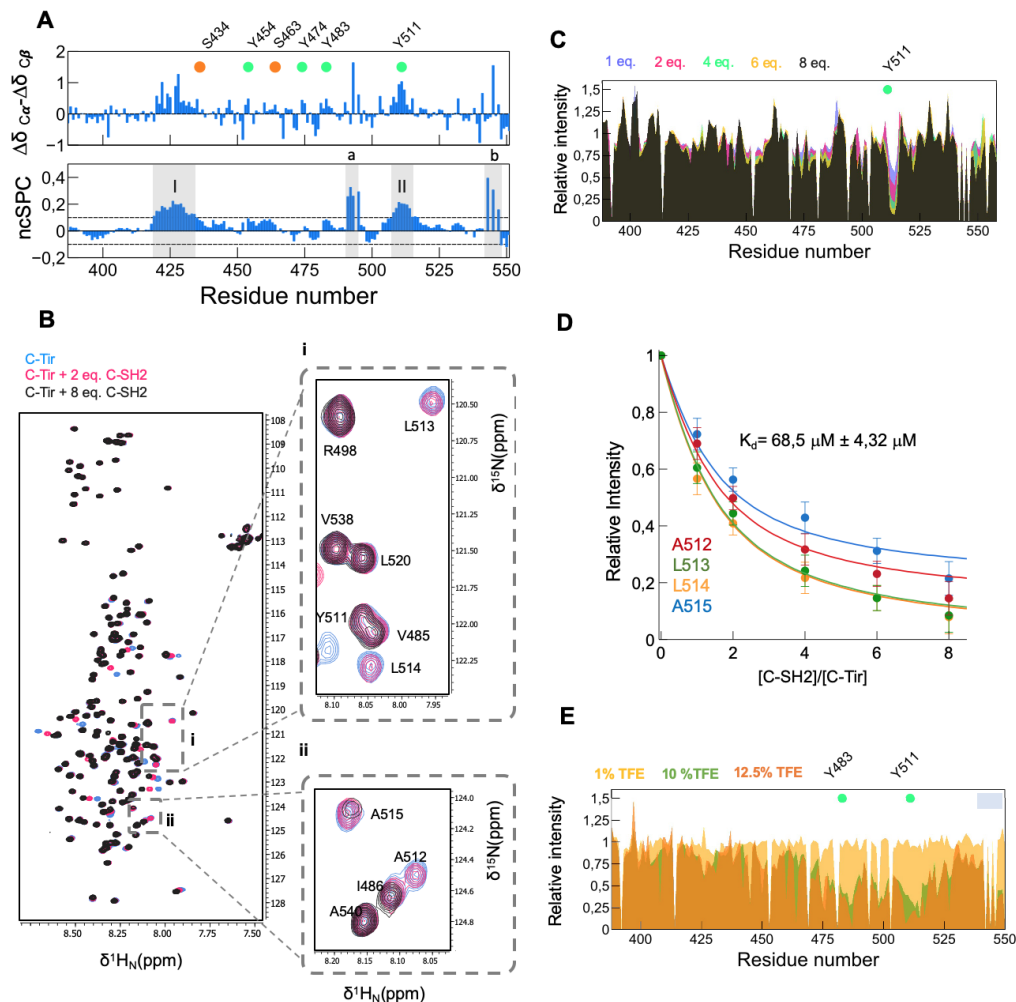

780  
 781 (A) Secondary chemical shifts ( $\Delta\delta_{\alpha}-\Delta\delta_{\beta}$ ) (top) and structural propensity plot (bottom) for C-Tir where the  
 782 dashed-lines depicts the random-coil threshold. Values above or below this threshold have  $\alpha$ -helix or  $\beta$ -sheet  
 783 propensities, respectively. Positive values (grey regions) show an increased  $\alpha$ -helix tendency in regions D420-  
 784 Q435 (I) and I507-A515 (II), as well as (a) F489-V495 and (b) T543-V547. Green and orange circles mark  
 785 phosphorylation sites on C-Tir for tyrosine and serine residues, respectively. (B) Overlay of  $[\text{H-}^{15}\text{N}]$ -HSQC  
 786 spectra of C-Tir in the absence (blue) and the presence of C-SH2 at 2.0 (pink) and 8.0 (dark grey)  
 787 equivalents. Expansions (right panels) show the NMR signal of residues A<sub>512</sub>LLA<sub>515</sub> with a significant intensity  
 788 drop due to C-SH2 binding. (C) Relative  $[\text{H-}^{15}\text{N}]$ -peak intensities from the titration analysis. (D) Global  
 789 fitting NMR quantification of the binding of C-SH2 to unphosphorylated C-Tir. (E) Residue-resolution  
 790 mapping of the effect of TFE on C-Tir. TFE-induced NMR attenuation profiles, i.e., the ratio of peak intensity  
 791 in the presence and absence of TFE, are plotted along the sequence. Green circles mark the position of  
 792 Y483 and Y511. The grey bar highlights the C-terminal residues with NMR-signal attenuation.

793

794 **Fig. 4 - Lipid-binding by disordered C-Tir.**

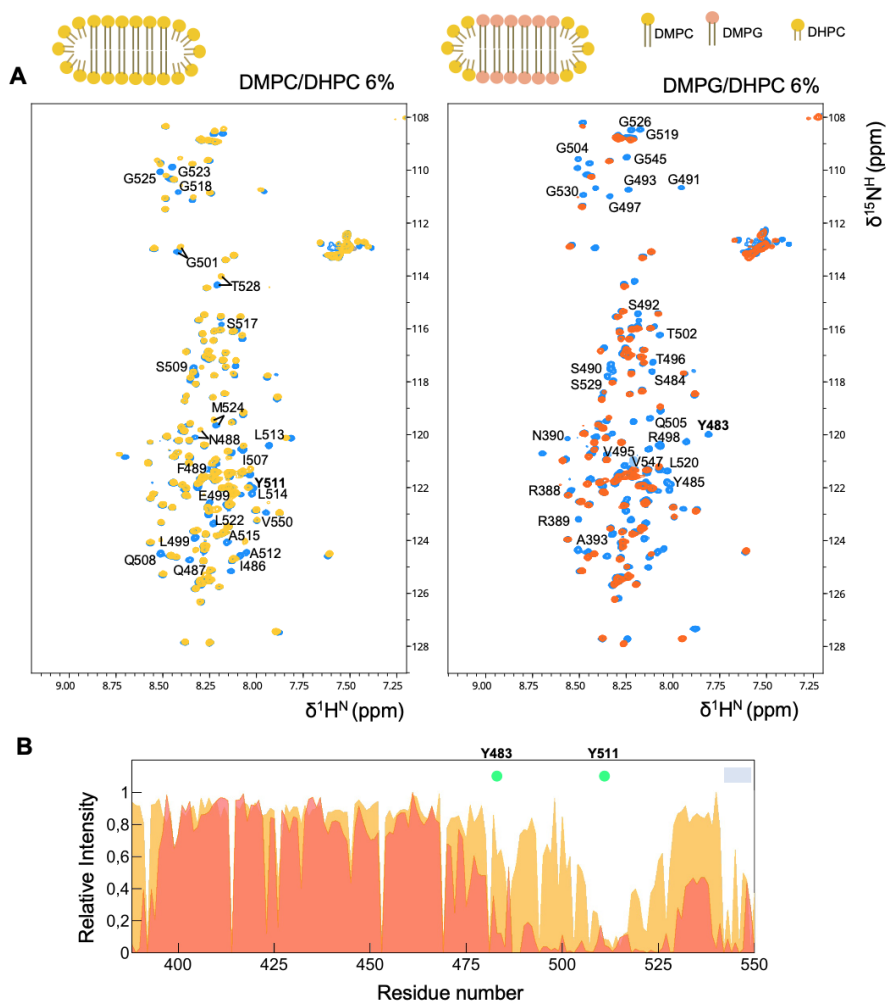

795

796

797 (A) NMR [ $^1\text{H}$ - $^{15}\text{N}$ ]-HSQC spectra of C-Tir in the absence (blue) and the presence of DMPC/DHPC (6% w/v),  
798 yellow) or DMPG/DHPC (6% w/v), orange) bicelles. C-Tir's HSQC data in bicelles superimpose well to free  
799 C-Tir, with identical chemical shifts for most visible resonances, pointing to intrinsic disorder. Residues with  
800 NMR signal attenuation upon addition of DMPC/DHPC bicelles are indicated in the spectra (left). The  
801 additional residues affected by DMPG/DHPC are also shown (right). (B) Lipid-induced NMR attenuation  
802 profiles are plotted against C-Tir primary sequence. Residues comprising the Y483 and Y511 ITIM motifs  
803 became less intense in lipids' presence, reinforcing their inherent ability to bind lipids. The grey bar  
804 highlights the C-terminal residues affected by lipids.

805

806

807 **Fig. 5 - C-Tir contains multiple phosphorylated docking sites.**

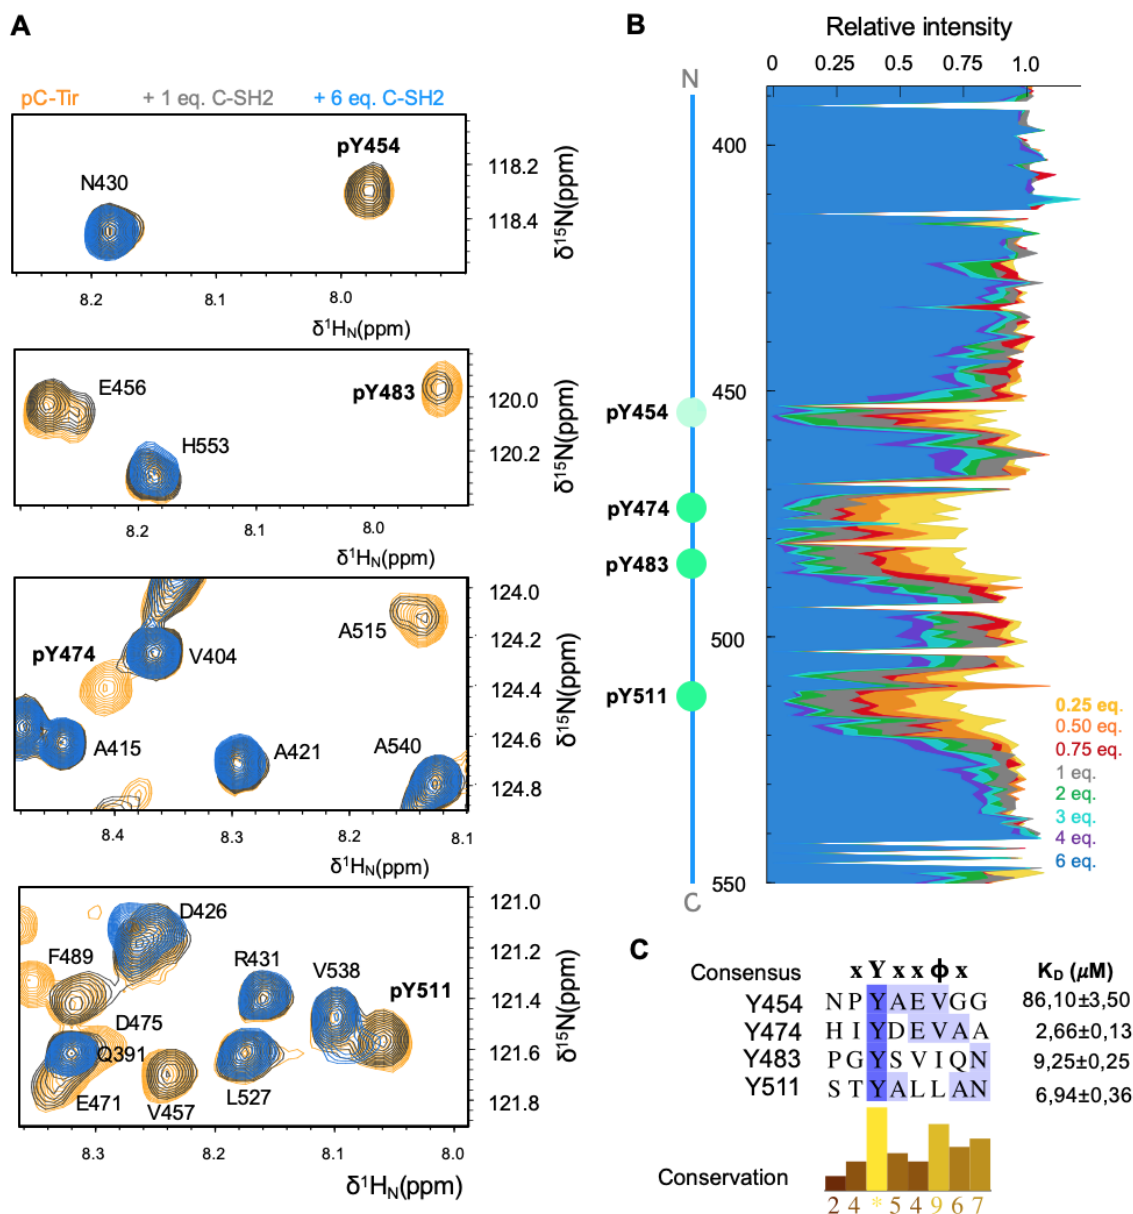

808  
 809 (A) NMR-detected binding of C-SH2 to phosphotyrosine pY454, pY474, pY483, pY511 before (orange) and  
 810 after adding 1.0 and 6.0 equivalents of C-SH2 (blue and grey, respectively). (B) Site-specific NMR signal  
 811 attenuation on pC-Tir due to C-SH2 binding, with local intensity drop around each phosphorylation site. (C)  
 812 Sequence alignment of xYx(x)φ motifs of C-Tir interacting with C-SH2 and their respective apparent K<sub>D</sub>  
 813 values obtained by global fitting 1:1 model the local intensity drop around each phosphorylation site. Darker  
 814 shades of blue refer to higher sequence identity. The conservation of physicochemical properties in each  
 815 alignment position is reported in the corresponding barplot below the alignment. Green circles denote  
 816 phosphorylation tyrosine-sites with color intensity reflecting the apparent relative affinity.

817

818 **Fig. 6 - N-Tir is a partially disordered dimer.**

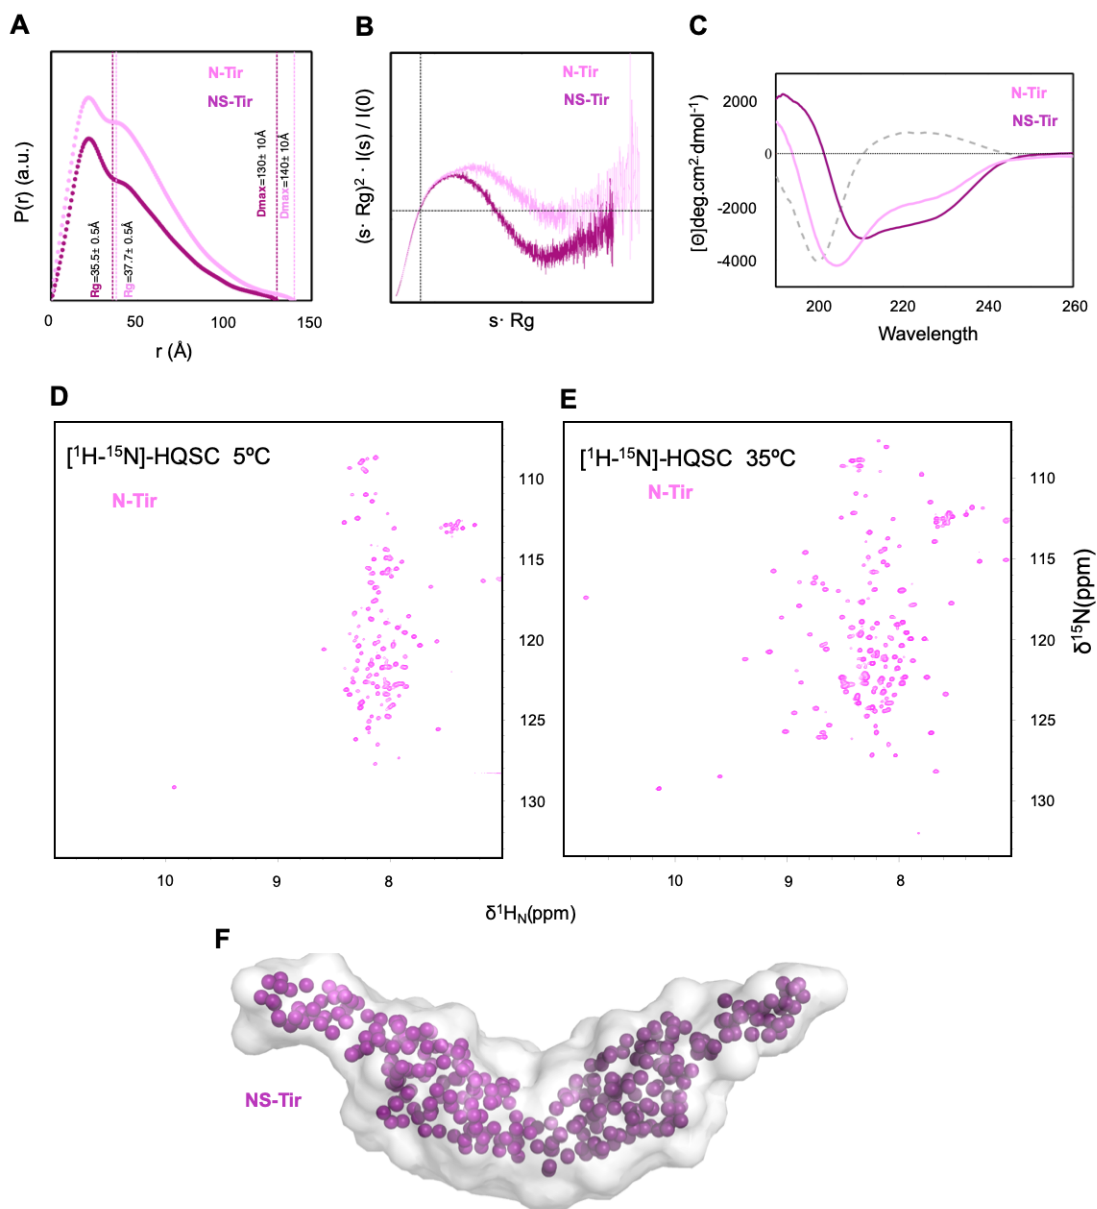

819

820 (A) Normalized pairwise distance distribution,  $P(r)$ , computed from experimental SAXS curves of N-Tir (pink)  
 821 and NS-Tir (purple) consistent with an elongated dimer. Dashed lines indicate the derived  $R_g$  and  $D_{max}$   
 822 values. (B) Kratky plots of N-Tir (pink) and NS-Tir (dark-magenta), highlighting a high conformationally  
 823 flexibility for N-Tir. (C) Far-CD spectra of N-Tir (pink) and NS-Tir (dark-magenta) and their difference (grey  
 824 dashed line). (D)  $[^1H-^{15}N]$ -HSQC spectra of N-Tir at 5 °C and (E) 35 °C revealing two dynamically different  
 825 regions within the protein. (F) NS-Tir dimer at low-resolution driven from SAXS with GASBOR (92).

826

827 **Fig. 7 - A proposed model of Tir structural organization.**

828

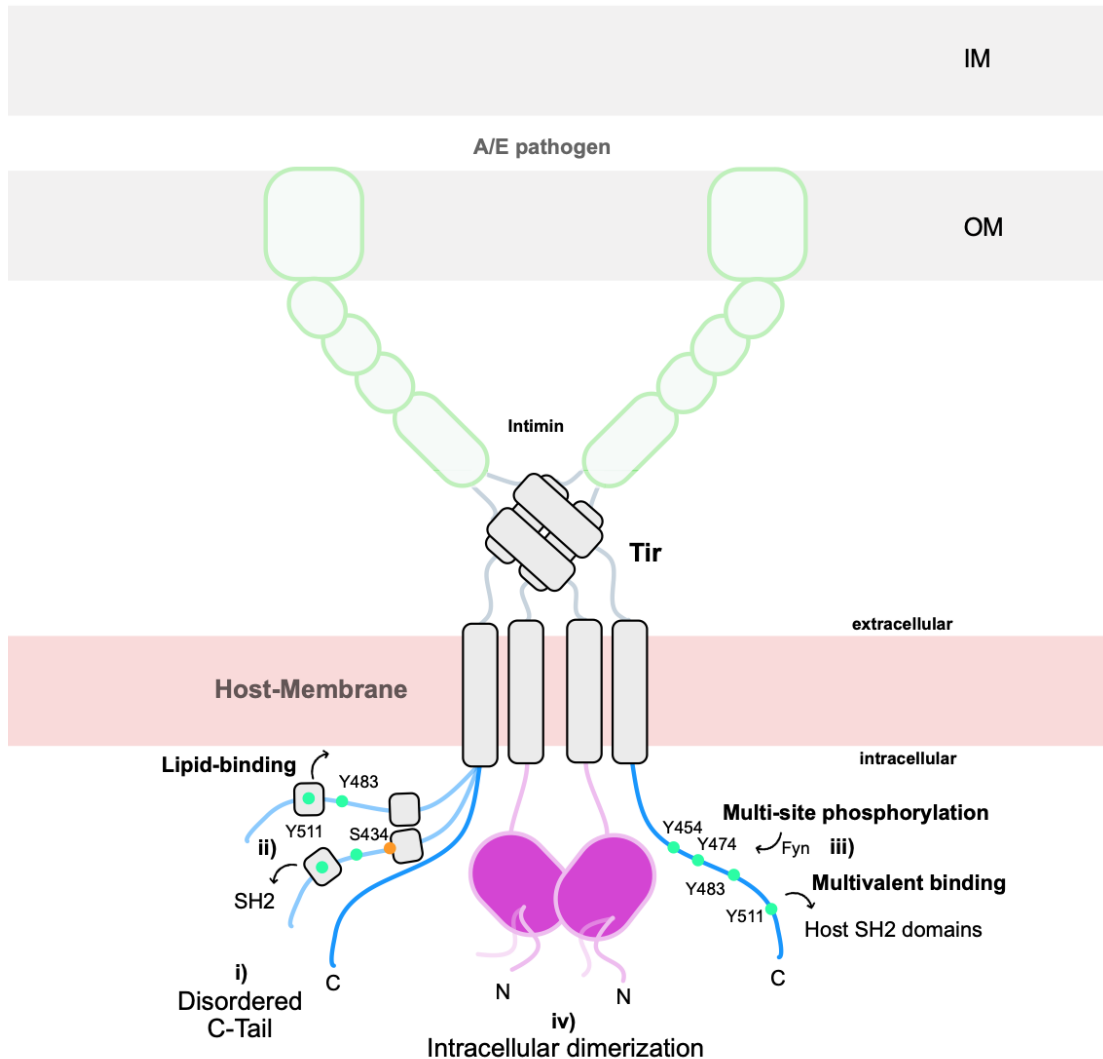

829

830

831 Tir in the host plasma membrane is depicted in a hairpin-topology while bound to intimin at the bacterial  
832 outer membrane. Our data support that (i) the C-terminal intracellular region of Tir (C-Tir) membrane  
833 receptor is disordered; (ii) with transient helical structural elements involved protein- and lipid-interactions;  
834 (iii) and host-like multi-phosphorylation sites that serve for docking various host SH2-domains. (iv) The  
835 intracellular N-terminal region of Tir (N-Tir) is partially disordered with a folded domain that self-assemble  
836 into dimer flanked by disordered residues, opening the question of whether host signaling activation  
837 involves intimin-induced dimerization or structural changes of preformed dimers. Green and orange circles  
838 denoted tyrosine and serine phosphorylation sites, respectively.

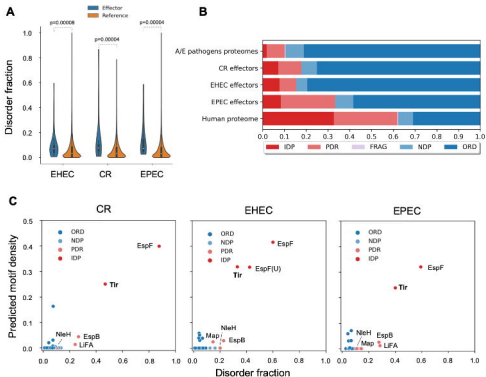

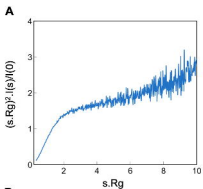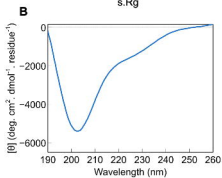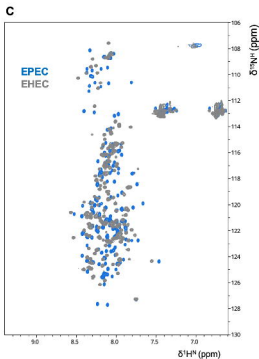



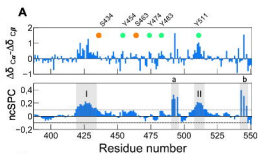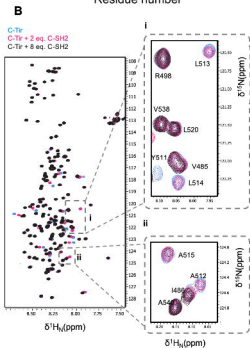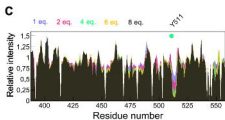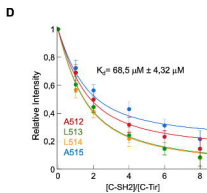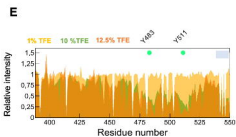

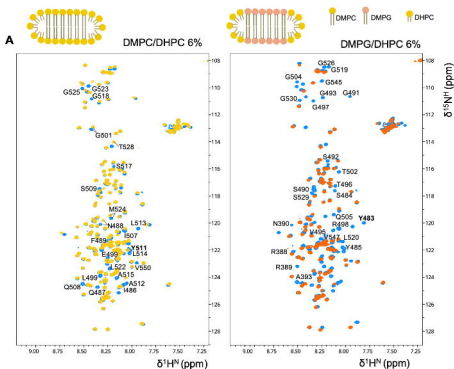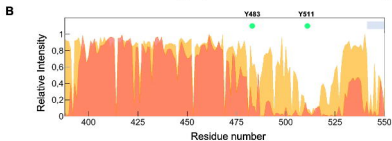

**A**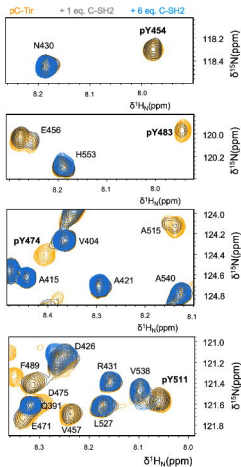**B**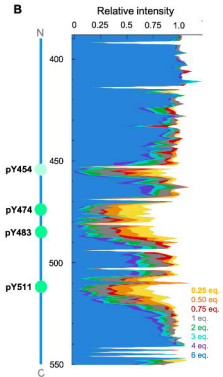**C**

| Consensus | x Y x x $\phi$ x | $K_D$ ( $\mu\text{M}$ ) |
|-----------|------------------|-------------------------|
| Y454      | NP Y A E V G G   | 86,10 $\pm$ 3,50        |
| Y474      | HI Y D E V A A   | 2,66 $\pm$ 0,13         |
| Y483      | PG Y S V I Q N   | 9,25 $\pm$ 0,25         |
| Y511      | ST Y A L L A N   | 6,94 $\pm$ 0,36         |

Conservation

2 4 5 4 9 6 7

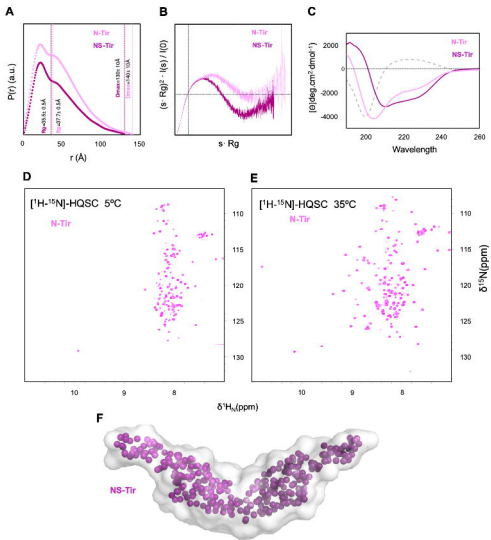

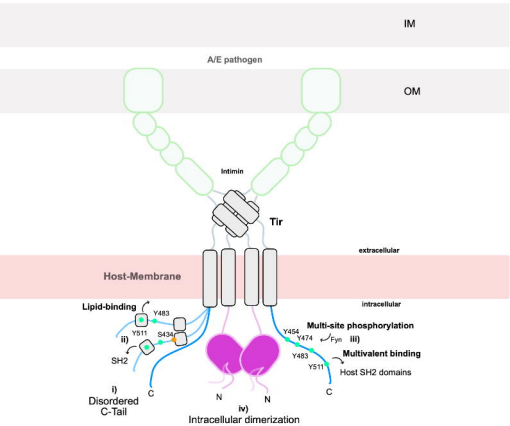

IM

A/E pathogen

OM

Intimin

Tir

extracellular

Host-Membrane

intracellular

Lipid-binding

Y483

Y511

SH2

ii)

S434

C

i)  
Disordered  
C-Tail

Multi-site phosphorylation

Y454

Y474

Y483

Y511

Fyn

iii)

Multivalent binding

Host SH2 domains

N

iv)

N

Intracellular dimerization
